# Supplementary material for: The quality and quantity of compounds affected by viral inactivation methods in dried blood spots
Source: publisher site journal article supplement (doi:10.1515/labmed-2023-0099), 2023-11-10
Supplement: Supplementary file 1 [file j_labmed-2023-0099_suppl_001.docx]

**Supplementary Table 1 The yield and quality of deoxyribonucleic acid measured by ultraviolet spectrophotometer**

| **Sample ID** | **Ctrl** | | **56℃ 30min** | | **UVA 30min** | | **70% Ethanol** | |
| --- | --- | --- | --- | --- | --- | --- | --- | --- |
| **Con.**  **(ng/μl)** | **OD260/OD280** | **Con.**  **(ng/μl)** | **OD260/OD280** | **Con.**  **(ng/μl)** | **OD260/OD280** | **Con.**  **(ng/μl)** | **OD260/OD280** |
| #1 | 5.8 | 1.46 | 7.1 | 1.76 | 3.5 | 1.59 | 9.2 | 1.57 |
| #2 | 13.1 | 1.66 | 13.9 | 1.78 | 8.3 | 1.57 | 13.3 | 1.64 |
| #3 | 7.7 | 1.63 | 7.3 | 1.64 | 5.4 | 1.58 | 8.1 | 1.56 |
| #4 | 14 | 1.52 | 14 | 1.76 | 16.1 | 1.57 | 11.1 | 1.76 |
| #5 | 10 | 1.88 | 11.5 | 1.55 | 9.3 | 1.68 | 9.8 | 1.77 |
| #6 | 10.6 | 1.82 | 14.2 | 1.66 | 10.8 | 1.45 | 6.3 | 1.78 |
| #7 | 18.1 | 1.71 | 17.8 | 1.70 | 11.2 | 1.56 | 17.1 | 1.67 |
| #8 | 21.4 | 1.66 | 25 | 1.65 | 13.5 | 1.64 | 18.9 | 1.72 |
| #9 | 9 | 1.76 | 11 | 1.55 | 6.9 | 1.51 | 6.9 | 1.68 |
| #10 | 7.9 | 1.71 | 9.6 | 1.72 | 5.3 | 1.99 | 7.3 | 1.74 |
| p value | 0.26 | | | | | | | |

Aber. Ctrl Ctrol; Con. Concentration. p value is calculated by One-way ANOVA (and nonparametric).
